# Supplementary material for: FISH-TAMB, a fixation-free mRNA fluorescent labeling technique, to target transcriptionally active members in microbial community
Source: Research Square preprint supplement (doi:10.21203/rs.3.rs-179810/v1), 2021-06-16
Supplement: Supplementary file 1 [file 12474f4a9e038de9fad1c0a9.docx]

**Table 1 Flow cytometry data of cell cultures.**
